# Supplementary material
Source: publisher figshare collection journal article supplement (https://future-science-group.figshare.com/ndownloader/files/35260246)
Supplement: Supplementary file 1 [file 35260246]

**Supplementary Table 1.** Summary of maintenance treatment after first-line FFN.

| Number of patients | Number of cycles of first-line FFN | Maintenance treatment |
| --- | --- | --- |
| 4 | 12 | Capecitabine* |
| 1 | 11 | Capecitabine |
| 1 | 18 | Capecitabine |
| 1 | 12 | FOLFIRI** |

*Schedule: 1250mg/m2 bid day 1 to 14 q21.

** Schedule: Calcium Levofolinate 200 mg/m2 + Irinotecan 180 mg/m2 + 5-fluorouracil 400 mg/m2 bolus + 5-fluorouracil 2400 mg/m2 continuous infusion 46 h, d1 q14.
